# Supplementary material
Source: publisher site journal article supplement (https://en-cdn.bio-protocol.org/attached/file/20180108/Supplemental%20Figures%201%2010.docx)
Supplement: Supplementary file 1 [file Supplemental%20Figures%201%2010.docx]

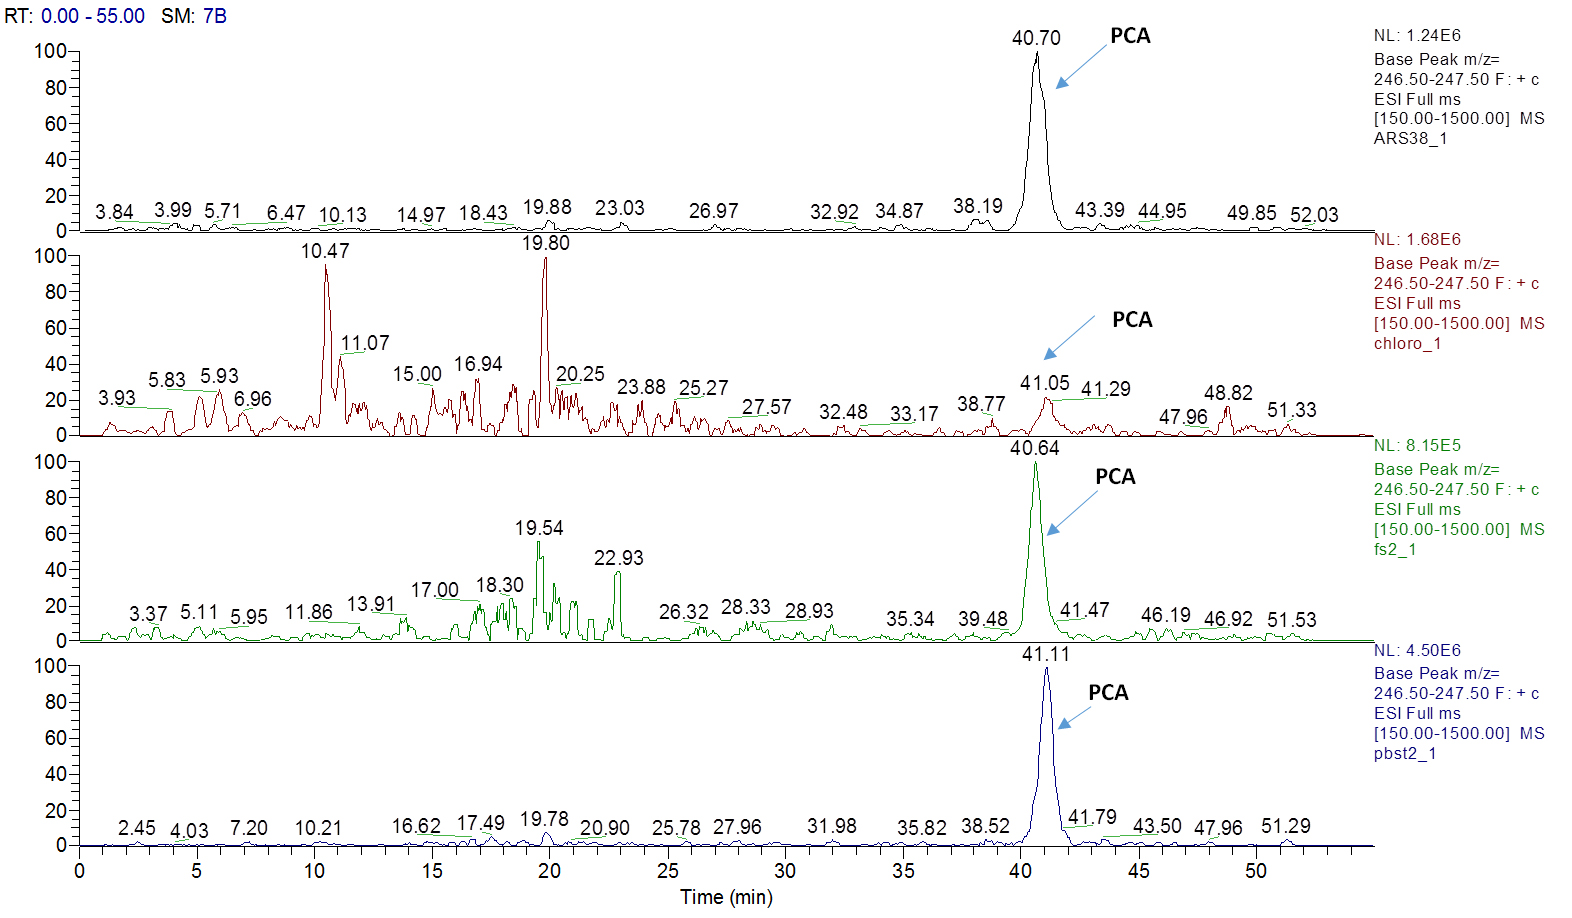


**Figure S1. Extracted ion current (XIC) chromatograms for phenazine-1-carboxylic acid (PCA), *m/z* 225, [M + H]+ and *m/z* 247, [M + Na]+ of four strains; ARS-38, RP-4, FS-2 and PB-St2**


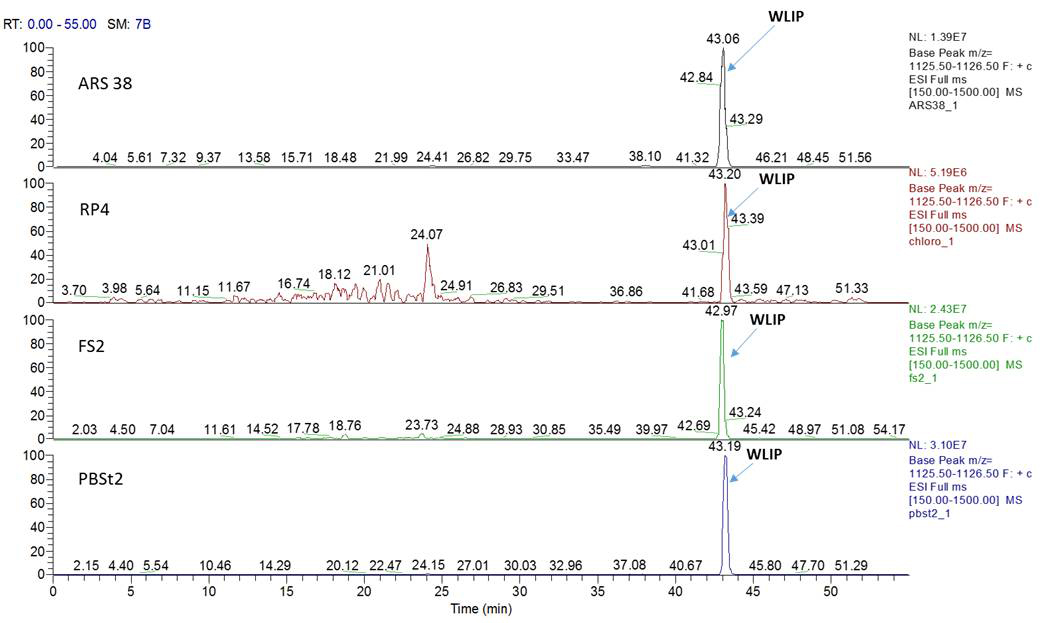


**Figure S2. Extracted ion current (XIC) chromatograms for white-line-inducing principle (WLIP), *m/z* 1126, [M + H]+ of four strains; ARS-38, RP-4, FS-2 and PB-St2**


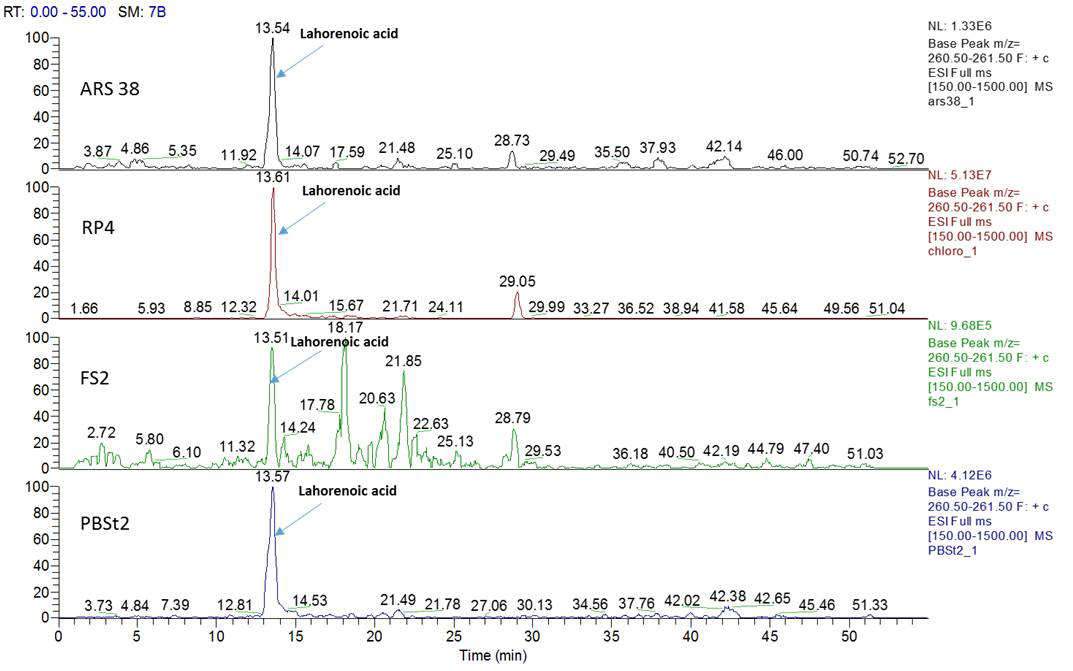


**Figure S3. Extracted ion current (XIC) chromatograms for Lahorenoic acid A, *m/z* 261, [M + H]+ of four strains; ARS-38, RP-4, FS-2 and PB-St2**


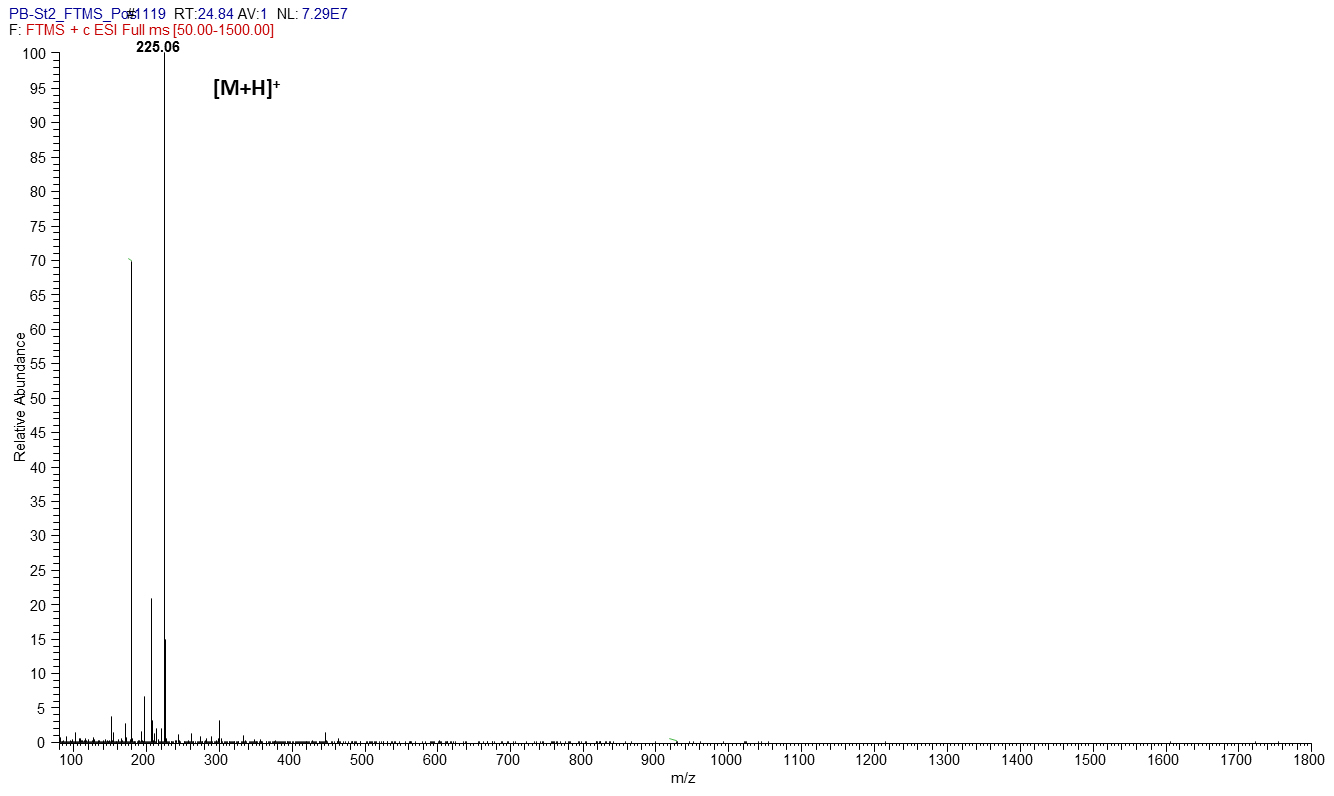


**Figure S4.** **Mass spectrum of Phenazine-1-carboxylic acid (PCA), *m/z* [M + H]+ 225**


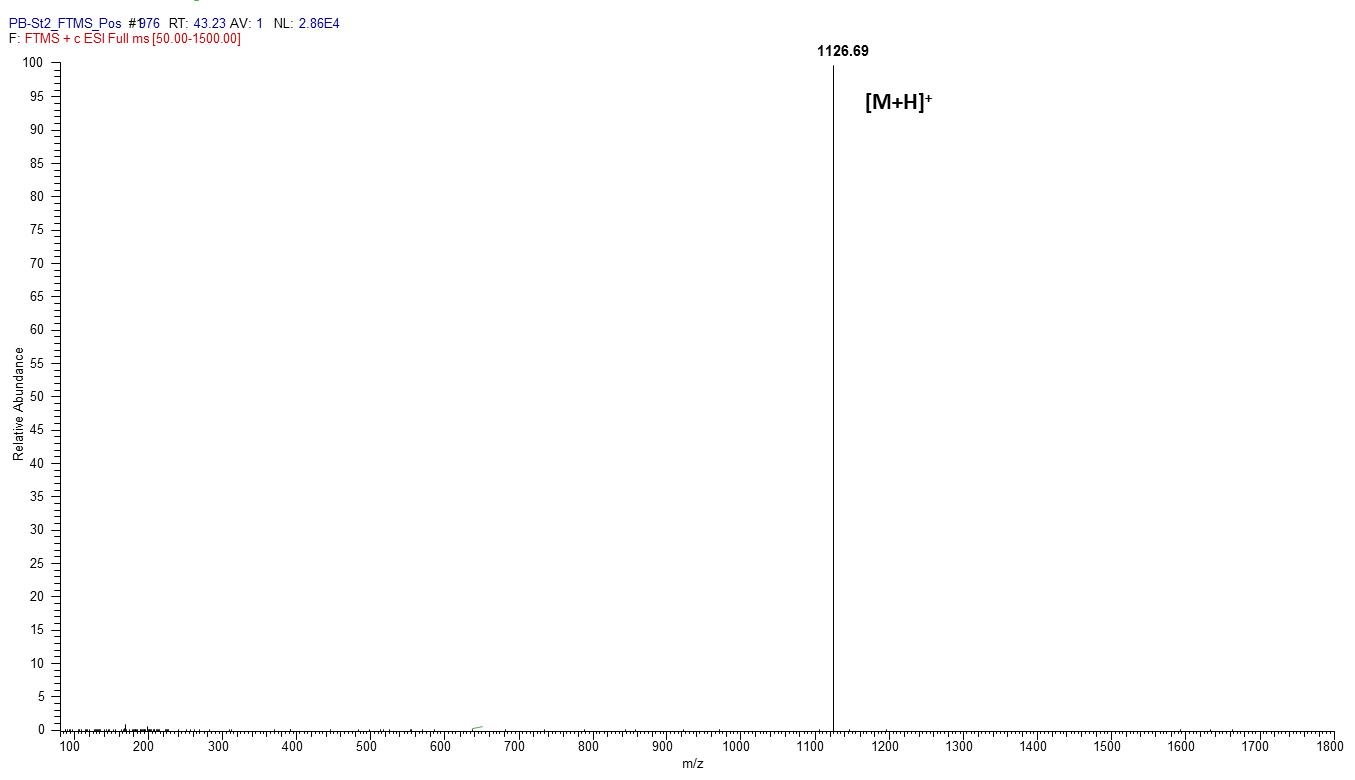


**Figure S5.** **Mass spectrum of White line inducing principle (WLIP), *m/z* [M + H]+ 1,126**


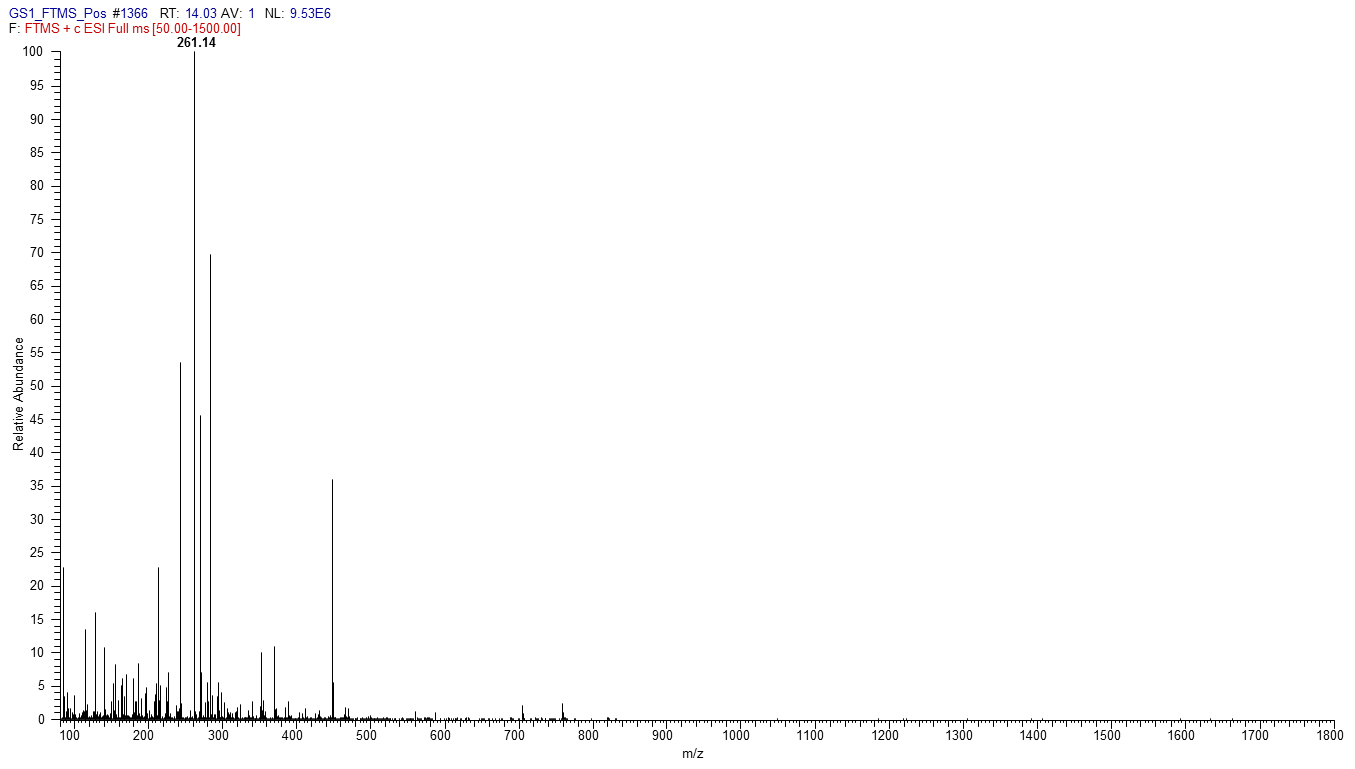


**Figure S6.** **Mass spectrum of Lahorenoic acid A, *m/z* [M + H]+ 261**


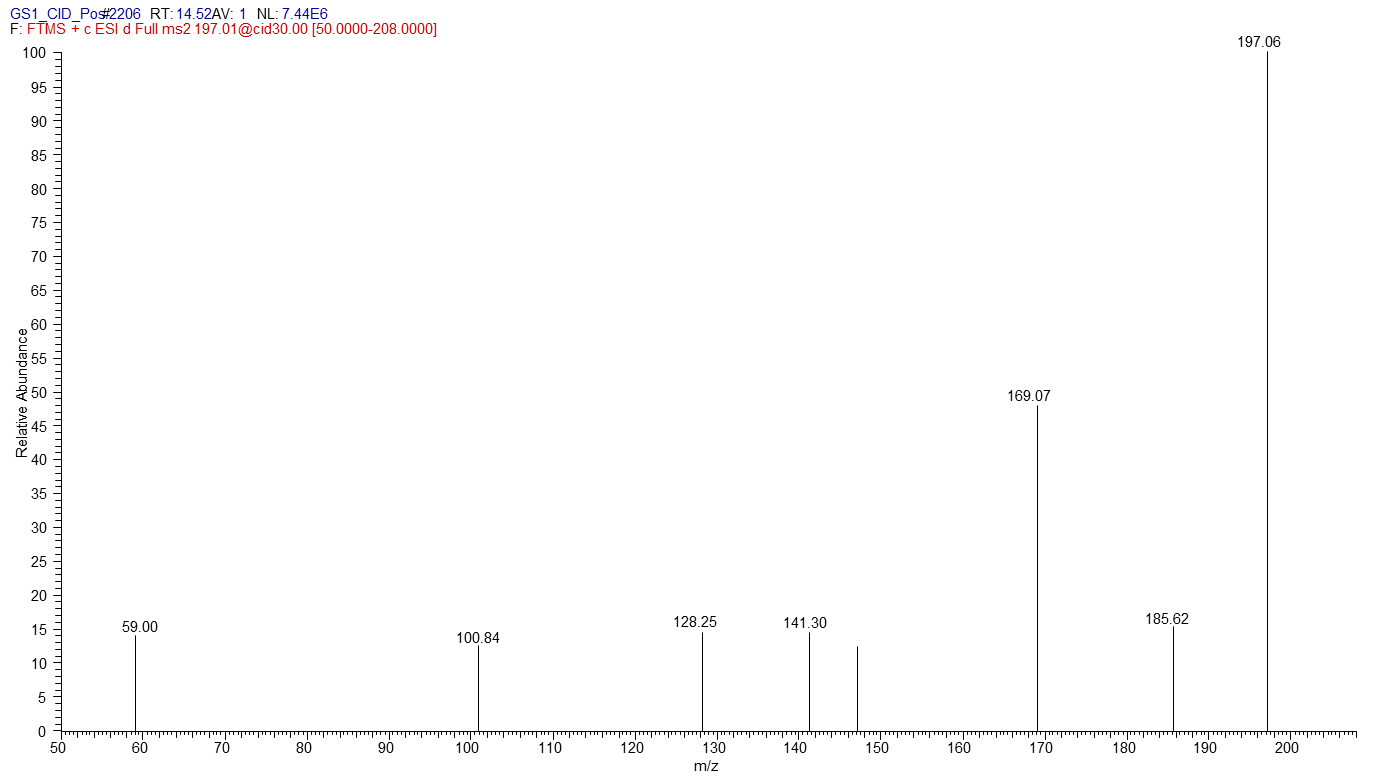


**Figure S7.** **MS/MS spectrum of 2-hydroxyphenazine (2-OH-Phz), *m/z* [M + H]+ 197**


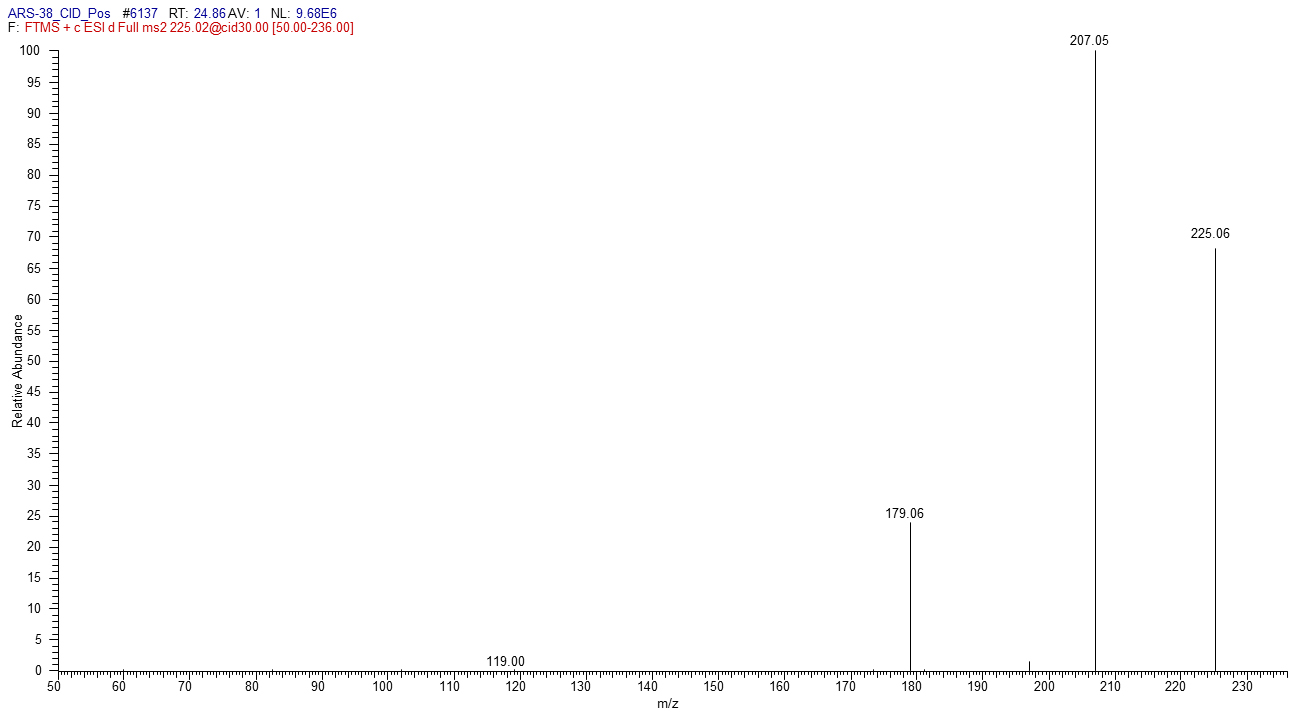


**Figure S8.** **M/MS spectrum of phenazine-1-carboxylic acid (PCA), *m/z* [M + H]+ 225**


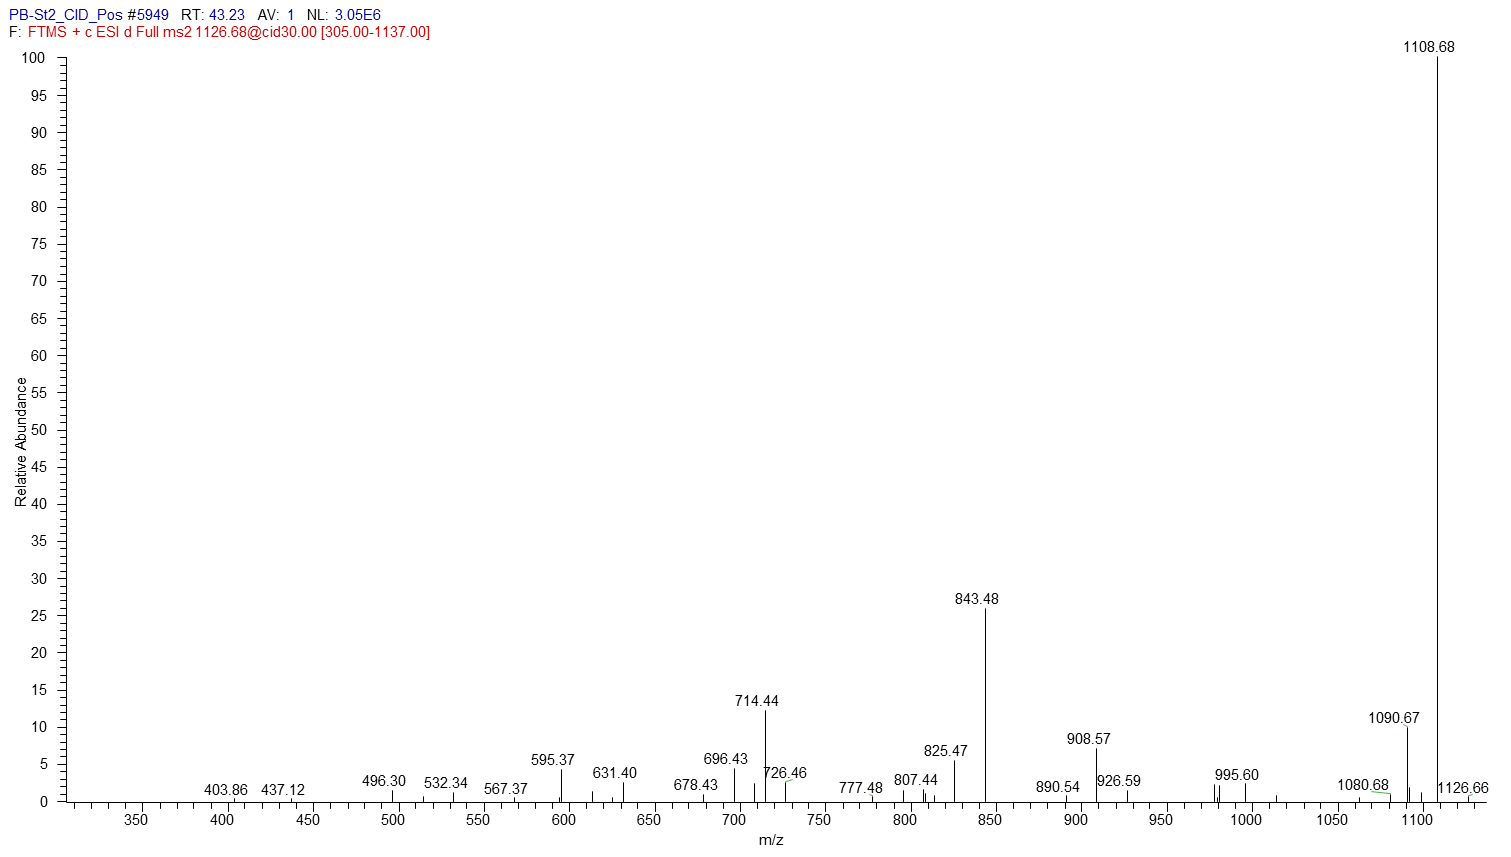


**Figure S9.** **M/MS spectrum of White line inducing principle (WLIP), *m/z* [M + H]+ 1126**


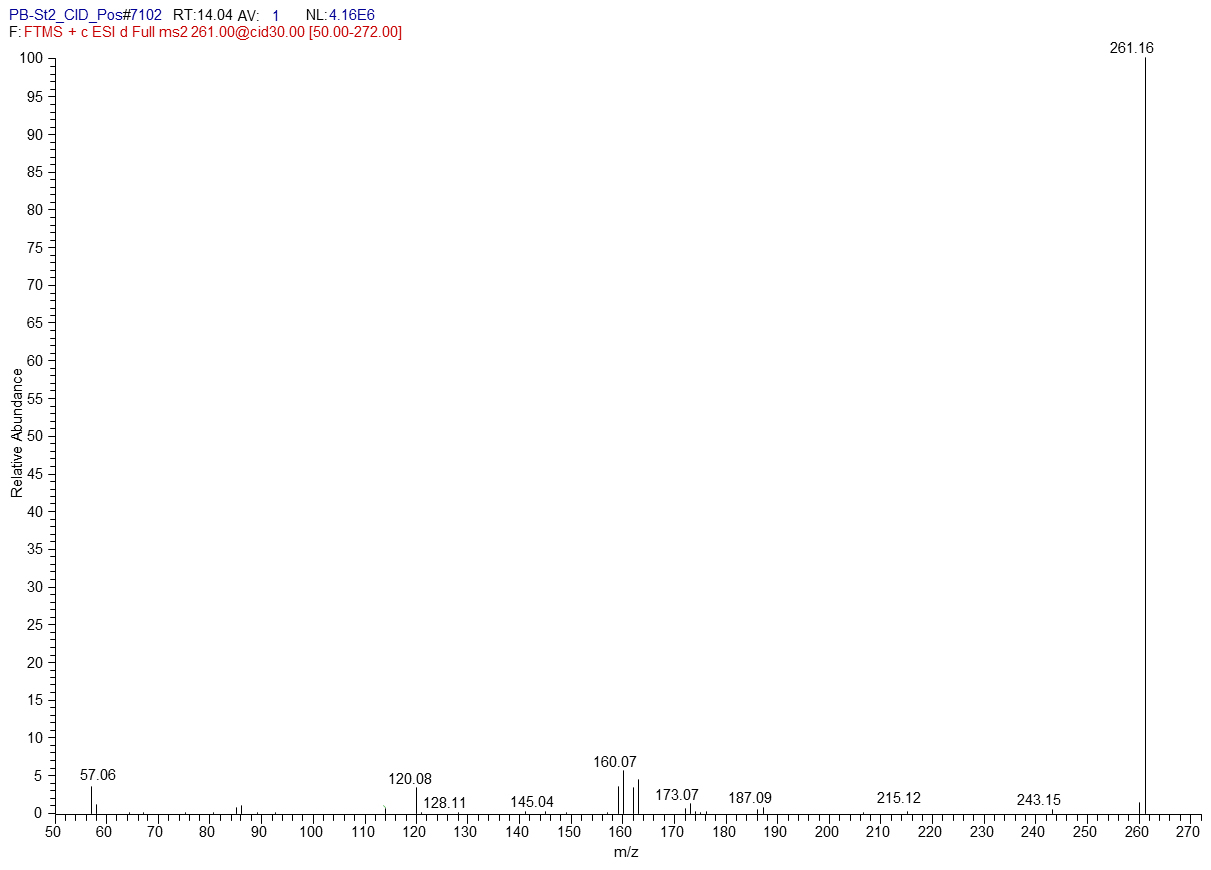


**Figure S10.** **M/MS spectrum of Lahorenoic acid A, *m/z* [M + H]+ 261**
